# Supplementary material for: Secondary analysis of the WOMAN trial to explore the risk of sepsis after invasive treatments for postpartum hemorrhage
Source: PubMed Central journal article supplement (PMC7814887; doi:10.1002/ijgo.12860), 2019-06-05
Supplement: IJGO-146-231-s001.pdf [file IJGO-146-231-s001.pdf]

# Supplementary tables - S1 guidance on diagnosing complications

## GUIDANCE FOR DATA COLLECTION Outcome form Section 5

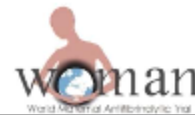

### INTRODUCTION

This guidance is to allow standardised reporting of complications in the WOMAN trial. Before circling 'YES' to questions in Section 5 of the OUTCOME FORM, please ensure that the event fulfils the definition given below.

### 5. COMPLICATIONS (circle one option on every line)

|                          |     |    |
|--------------------------|-----|----|
| a) Pulmonary embolism    | YES | NO |
| b) Deep vein thrombosis  | YES | NO |
| c) Stroke                | YES | NO |
| d) Myocardial infarction | YES | NO |
| e) Renal Failure         | YES | NO |
| f) Cardiac Failure       | YES | NO |
| g) Respiratory Failure   | YES | NO |
| h) Hepatic Failure       | YES | NO |
| i) Sepsis                | YES | NO |
| j) Seizures              | YES | NO |

**PLEASE NOTE:** Any complications not listed above should be reported as per protocol using an Adverse Event Reporting form.

#### a) PULMONARY EMBOLISM (PE)

The diagnosis of PE requires one of the following:

- High probability ventilation/perfusion lung scan
- Intraluminal filling defect of segmental or larger artery on Helical CT scan
- Intraluminal filling defect on a pulmonary angiography

OR

- A positive diagnostic test for DVT + low or intermediate probability ventilation/perfusion lung scan or a subsegmental defect on a helical CT scan

#### b) DEEP VEIN THROMBOSIS (DVT)

The diagnosis of DVT requires both clinical assessment and confirmation by one of the following tests:

- A persistent intraluminal filling defect on contrast venography
- Non-compressibility of one or more venous segments on B mode compression ultrasonography
- Intraluminal filling defect on a contrast CT scan

#### c) STROKE

This is defined as 'a new focal neurological deficit with signs and symptoms lasting more than 24 hours'<sup>1</sup>

#### d) MYOCARDIAL INFARCTION (MI)

The universal definition of myocardial infarction<sup>2</sup> should be used: Detection of rise and/or fall of cardiac biomarker values (preferably troponin) with at least one value above the 99th percentile of the upper reference limit and with at least one of the following:

- Symptoms of ischaemia
- ECG abnormalities: new or presumably new significant ST-T changes or new LBBB (left bundle branch block) or pathological Q waves
- Imaging evidence of new loss of viable myocardium, or new regional wall motion abnormality
- Identification of an intracoronary thrombus by angiography or autopsy
- Cardiac death with symptoms suggestive of myocardial ischaemia
- Stent thrombosis associated with MI when detected by coronary angiography or autopsy in the setting of myocardial ischaemia and with a rise and/or fall of cardiac biomarker values with at least one value above the 99<sup>th</sup> percentile URL
